# Supplementary material for: Rhizospheric Microbiome Responses to Cover Crop Suppression Methods
Source: MDPI journal article supplement (doi:10.3390/agronomy12102246), 2022-09-20
Supplement: s1 [file s1]

**Table S1.** Primer used for qPCR.

| Group           | Primer          | Sequence (5'→3')        | Size (bp) | Reference            |
|-----------------|-----------------|-------------------------|-----------|----------------------|
| <i>Bacteria</i> | 338F            | ACTCCTACGGGAGGCAGCAG    | 196       | Fierer et al. [1]    |
|                 | 518R            | ATTACCGCGGCTGCTGG       |           |                      |
| <i>Archaea</i>  | Arch346aF       | CGGGGYGCASCAGGCGCGAA    | 570       | Hoshino et al. [2]   |
|                 | Arch934b        | GTGCTCCCCCGCCAATTCCT    |           |                      |
| AOB             | amoA-1F         | GGGGTTTCTACTGGTGGT      | 491       | Rotthauwe et al. [3] |
|                 | amoA-2R         | CCCCTCKGSAAAGCCTTCTTC   |           |                      |
| AOA             | amoA19F         | ATGGTCTGGCTWAGACG       | 624       | Leininger et al. [4] |
|                 | CrenamoA616r48x | GCCATCCABCKRTANGTCCA    |           |                      |
| <i>nirK</i>     | nirK876         | ATYGGCGG VAYGGCGA       | 160       | Henry et al. [6]     |
|                 | nirK1040        | GCCTCGAT CAGRTRTGGT     |           |                      |
| <i>nirS</i>     | nirScd3aF       | AACGYSAAGGARACSGG       | 425       | Kandeler et al. [7]  |
|                 | nirSR3cd        | GASTTCGGRTGSGTCTTSAYGAA |           |                      |

**Table S2.** Equations and efficiency of qPCR standard curves for samples processed in 2018 and 2019. The results for ammonia-oxidizing bacteria (AOB), ammonia-oxidizing archaea (AOA), nitrite reductase genes (*nirS* and *nirK*), *Bacteria*, and *Archaea* are indicated.

| Gen         | Group           | Year | Equation                                           | R <sup>2</sup> | Efficiency (%) |
|-------------|-----------------|------|----------------------------------------------------|----------------|----------------|
| 16S rRNA    | <i>Bacteria</i> | 2018 | $Ct = 40.12 - 3.66 \log_{10} (\text{copy number})$ | 0.999          | 87.00          |
|             |                 | 2019 | $Ct = 39.76 - 3.67 \log_{10} (\text{copy number})$ | 0.999          | 87.29          |
| 16S rRNA    | <i>Archaea</i>  | 2018 | $Ct = 37.9 - 3.74 \log_{10} (\text{copy number})$  | 1              | 85.20          |
|             |                 | 2019 | $Ct = 37.25 - 3.7 \log_{10} (\text{copy number})$  | 0.984          | 86.34          |
| <i>amoA</i> | AOA             | 2018 | $Ct = 35.04 - 3.86 \log_{10} (\text{copy number})$ | 0.999          | 81.69          |
|             |                 | 2019 | $Ct = 36.82 - 3.78 \log_{10} (\text{copy number})$ | 1              | 84.05          |
| <i>amoA</i> | AOB             | 2018 | $Ct = 43.17 - 3.87 \log_{10} (\text{copy number})$ | 0.999          | 81.45          |
|             |                 | 2019 | $Ct = 36.99 - 4.03 \log_{10} (\text{copy number})$ | 1              | 77.04          |
| <i>nirK</i> | <i>nirK</i>     | 2018 | $Ct = 35.8 - 3.56 \log_{10} (\text{copy number})$  | 0.999          | 90.88          |
|             |                 | 2019 | $Ct = 39.68 - 3.67 \log_{10} (\text{copy number})$ | 1              | 86.68          |
| <i>nirS</i> | <i>nirS</i>     | 2018 | $Ct = 36.9 - 3.56 \log_{10} (\text{copy number})$  | 0.999          | 90.86          |
|             |                 | 2019 | $Ct = 42.51 - 3.72 \log_{10} (\text{copy number})$ | 0.996          | 85.67          |

**Table S3.** Principal component analysis of bacteria genera showing the eigenvector, the eigenvalue, and the cumulative proportion the of the dataset variability explained by each of the seven principal components (PCs) extracted. Genera with loadings  $>|0.45|$  are bolded.

|                              | PC1                          | PC2          | PC3          | PC4          | PC5          | PC6         | PC7   |
|------------------------------|------------------------------|--------------|--------------|--------------|--------------|-------------|-------|
| Eigenvalue                   | 5.93                         | 3.70         | 2.57         | 2.10         | 1.73         | 1.56        | 1.47  |
| Proportion                   | 0.22                         | 0.14         | 0.10         | 0.08         | 0.06         | 0.06        | 0.05  |
| Cum. proportion              | 0.22                         | 0.36         | 0.45         | 0.53         | 0.59         | 0.65        | 0.71  |
| Eigenvector                  | Component correlation scores |              |              |              |              |             |       |
| <i>Abditibacterium</i>       | -0.07                        | <b>0.68</b>  | 0.19         | 0.30         | -0.05        | -0.22       | -0.24 |
| <i>Azoarcus</i>              | 0.30                         | <b>-0.46</b> | 0.24         | <b>0.51</b>  | -0.22        | -0.24       | 0.29  |
| <i>Brevifollis</i>           | <b>-0.58</b>                 | 0.12         | 0.18         | <b>-0.52</b> | 0.19         | -0.20       | 0.02  |
| <i>Brevundimonas</i>         | 0.44                         | 0.13         | 0.06         | 0.03         | 0.21         | <b>0.46</b> | -0.30 |
| <i>Chitinispirillum</i>      | <b>-0.53</b>                 | -0.13        | -0.27        | -0.15        | 0.25         | 0.21        | 0.28  |
| <i>Curvibacter</i>           | <b>0.65</b>                  | 0.40         | 0.05         | -0.09        | 0.24         | 0.27        | -0.17 |
| <i>Duganella</i>             | <b>0.70</b>                  | 0.35         | -0.18        | -0.06        | -0.02        | -0.17       | 0.27  |
| <i>Erythrobacter</i>         | <b>0.70</b>                  | -0.35        | -0.12        | -0.19        | 0.06         | -0.39       | 0.19  |
| <i>Flaviaesturariibacter</i> | 0.05                         | 0.39         | -0.44        | 0.36         | 0.17         | -0.11       | -0.36 |
| <i>Flavilitoribacter</i>     | <b>0.61</b>                  | 0.07         | -0.01        | -0.39        | -0.35        | 0.05        | -0.11 |
| <i>Geminisphaera</i>         | -0.14                        | -0.18        | <b>0.63</b>  | -0.17        | 0.29         | -0.36       | -0.11 |
| <i>Gemmata</i>               | 0.43                         | -0.16        | <b>0.47</b>  | 0.38         | 0.15         | 0.07        | -0.14 |
| <i>Gp17</i>                  | 0.05                         | <b>-0.69</b> | -0.26        | -0.29        | 0.00         | 0.13        | -0.44 |
| <i>Kineosporia</i>           | 0.30                         | 0.11         | 0.27         | -0.35        | <b>-0.59</b> | 0.17        | 0.11  |
| <i>Lacunisphaera</i>         | <b>-0.49</b>                 | 0.22         | -0.25        | 0.13         | 0.19         | 0.34        | 0.35  |
| <i>Litorilinea</i>           | -0.34                        | <b>-0.60</b> | 0.28         | 0.26         | 0.19         | 0.24        | -0.04 |
| <i>Longimicrobium</i>        | <b>0.49</b>                  | -0.24        | -0.18        | -0.32        | <b>0.54</b>  | -0.15       | 0.11  |
| <i>Marmoricola</i>           | 0.08                         | 0.21         | -0.17        | -0.39        | -0.04        | 0.34        | 0.36  |
| <i>Massilia</i>              | <b>0.77</b>                  | <b>0.53</b>  | -0.05        | 0.10         | 0.13         | 0.11        | -0.02 |
| <i>Methylobacterium</i>      | 0.01                         | 0.37         | <b>0.67</b>  | 0.17         | 0.07         | 0.19        | 0.37  |
| <i>Nocardioides</i>          | <b>-0.57</b>                 | 0.22         | -0.44        | 0.30         | -0.05        | 0.13        | 0.16  |
| <i>Novosphingobium</i>       | <b>0.78</b>                  | 0.15         | -0.05        | -0.14        | 0.05         | 0.05        | 0.04  |
| <i>Parviterribacter</i>      | <b>0.48</b>                  | <b>-0.58</b> | 0.21         | 0.13         | -0.13        | 0.26        | 0.28  |
| <i>Phenylobacterium</i>      | <b>0.53</b>                  | -0.14        | -0.07        | 0.37         | -0.08        | 0.23        | -0.06 |
| <i>Sediminibacterium</i>     | -0.40                        | <b>0.54</b>  | 0.18         | -0.08        | -0.45        | -0.17       | -0.05 |
| <i>Stella</i>                | 0.39                         | -0.07        | <b>-0.58</b> | 0.31         | -0.03        | -0.39       | 0.27  |
| <i>Thermanaerothrix</i>      | -0.13                        | <b>-0.46</b> | -0.33        | 0.03         | <b>-0.50</b> | 0.12        | -0.21 |

**Table S4.** Principal component analysis of fungal genera showing the eigenvector, the eigenvalue, and the cumulative proportion the of the dataset variability explained by each of the eight principal components (PCs) extracted. Genera with loadings >|0.45| are bolded.

|                           | PC1                          | PC2          | PC3          | PC4          | PC5          | PC6         | PC7          | PC8          |
|---------------------------|------------------------------|--------------|--------------|--------------|--------------|-------------|--------------|--------------|
| <b>Eigenvalue</b>         | 4.10                         | 3.37         | 2.76         | 2.33         | 2.27         | 1.86        | 1.56         | 1.38         |
| <b>Proportion</b>         | 0.15                         | 0.12         | 0.10         | 0.09         | 0.08         | 0.07        | 0.06         | 0.05         |
| <b>Cum. proportion</b>    | 0.15                         | 0.28         | 0.38         | 0.47         | 0.55         | 0.62        | 0.68         | 0.73         |
| <b>Eigenvector</b>        | Component correlation scores |              |              |              |              |             |              |              |
| <i>Alternaria</i>         | <b>0.74</b>                  | 0.33         | 0.08         | 0.05         | 0.20         | -0.20       | -0.06        | 0.16         |
| <i>Atracidymella</i>      | 0.20                         | 0.10         | -0.13        | 0.42         | -0.37        | -0.07       | 0.28         | 0.38         |
| <i>Auricularia</i>        | -0.26                        | <b>0.58</b>  | -0.27        | -0.05        | 0.24         | -0.32       | -0.15        | 0.12         |
| <i>Corynascus</i>         | -0.31                        | <b>0.47</b>  | <b>-0.48</b> | -0.01        | 0.00         | -0.17       | -0.13        | -0.09        |
| <i>Davidiella</i>         | <b>0.75</b>                  | -0.10        | 0.30         | 0.17         | 0.32         | -0.08       | 0.13         | 0.03         |
| <i>Dokmaia</i>            | <b>-0.54</b>                 | 0.29         | <b>0.53</b>  | 0.10         | 0.09         | 0.00        | -0.01        | 0.26         |
| <i>Edenia</i>             | 0.32                         | <b>-0.51</b> | -0.14        | -0.27        | <b>-0.47</b> | 0.04        | -0.01        | -0.10        |
| <i>Elaphocordyceps</i>    | -0.18                        | <b>-0.54</b> | 0.10         | 0.14         | 0.07         | 0.34        | 0.27         | -0.26        |
| <i>Exophiala</i>          | 0.22                         | <b>0.50</b>  | -0.21        | 0.15         | 0.20         | <b>0.59</b> | -0.09        | -0.23        |
| <i>Haematonectria</i>     | <b>-0.51</b>                 | 0.01         | 0.43         | -0.04        | -0.04        | -0.12       | 0.34         | 0.24         |
| <i>Lecythophora</i>       | 0.40                         | -0.05        | <b>0.50</b>  | -0.39        | -0.19        | 0.04        | -0.27        | 0.19         |
| <i>Microdochium</i>       | 0.40                         | 0.14         | -0.18        | <b>0.46</b>  | -0.16        | -0.24       | -0.26        | 0.00         |
| <i>Mycena</i>             | -0.21                        | -0.40        | <b>-0.57</b> | -0.05        | 0.12         | -0.36       | 0.36         | -0.03        |
| <i>Myrmecridium</i>       | 0.00                         | <b>-0.52</b> | -0.18        | 0.26         | 0.19         | 0.23        | <b>-0.60</b> | 0.12         |
| <i>Periconia</i>          | 0.31                         | -0.18        | -0.22        | -0.20        | -0.04        | -0.19       | 0.24         | <b>-0.56</b> |
| <i>Phaeosphaeria</i>      | -0.18                        | 0.28         | -0.23        | <b>-0.72</b> | -0.02        | -0.14       | -0.01        | 0.20         |
| <i>Phialocephala</i>      | 0.03                         | <b>0.49</b>  | -0.02        | 0.15         | <b>0.58</b>  | 0.19        | -0.08        | -0.37        |
| <i>Phialophora</i>        | <b>-0.48</b>                 | -0.16        | 0.25         | 0.45         | 0.35         | -0.38       | 0.18         | -0.13        |
| <i>Phoma</i>              | 0.43                         | <b>-0.49</b> | -0.07        | -0.07        | 0.30         | -0.08       | 0.19         | 0.14         |
| <i>Podospora</i>          | <b>0.85</b>                  | 0.24         | -0.02        | 0.13         | 0.12         | -0.02       | 0.21         | 0.26         |
| <i>Powellomyces</i>       | -0.09                        | -0.25        | -0.05        | <b>-0.63</b> | 0.25         | 0.19        | -0.20        | 0.08         |
| <i>Preussia</i>           | -0.19                        | -0.42        | -0.41        | -0.01        | 0.35         | 0.32        | -0.05        | 0.39         |
| <i>Pseudallescheria</i>   | 0.16                         | <b>0.59</b>  | 0.22         | -0.43        | -0.22        | 0.25        | 0.36         | -0.15        |
| <i>Rhizopycnis</i>        | 0.26                         | -0.25        | <b>0.76</b>  | -0.07        | 0.19         | -0.11       | -0.13        | -0.18        |
| <i>Sclerostagonospora</i> | 0.19                         | -0.01        | -0.15        | 0.13         | <b>-0.65</b> | -0.28       | -0.31        | -0.16        |
| <i>Spizellomyces</i>      | <b>-0.48</b>                 | -0.03        | 0.42         | 0.16         | -0.31        | -0.07       | -0.28        | -0.16        |
| <i>Tricladium</i>         | -0.10                        | 0.10         | -0.09        | 0.35         | -0.45        | <b>0.64</b> | 0.25         | 0.12         |

**Table S5.** Matrix of Pearson's correlation coefficients among microbial indicator groups for each taxon responsive to treatments (Bacteria PC1 and PC3, Fungi PC1) and soil properties of nitrate (NO<sub>3</sub><sup>-</sup>), ammonium (NH<sub>4</sub><sup>+</sup>), and available P (Pa).

|                              | BPC1         | BPC3  | FPC1         | NH <sub>4</sub> <sup>+</sup> | NO <sub>3</sub> <sup>-</sup> | Pa |
|------------------------------|--------------|-------|--------------|------------------------------|------------------------------|----|
| BPC1†                        | 1            |       |              |                              |                              |    |
| BPC3                         | 0            | 1     |              |                              |                              |    |
| FPC1                         | <b>0,53</b>  | -0,35 | 1            |                              |                              |    |
| NH <sub>4</sub> <sup>+</sup> | -0,24        | 0,07  | <b>-0,41</b> | 1                            |                              |    |
| NO <sub>3</sub> <sup>-</sup> | <b>-0,41</b> | 0,24  | <b>-0,51</b> | <b>0,68</b>                  | 1                            |    |
| Pa                           | 0,03         | -0,14 | -0,07        | -0,13                        | -0,15                        | 1  |

†BPC1, BPC3, Bacteria PC1 and PC3, respectively; FPC1, Fungi PC1. Bolded correlation coefficients indicate statistical significance at  $\alpha = 0.05$ .

**Table S6.** Matrix of Pearson's correlation coefficients among the abundance of nitrogen cycle genes (AOA, AOB, *nirS*, and *nirK*) and soil properties of nitrate (NO<sub>3</sub><sup>-</sup>), ammonium (NH<sub>4</sub><sup>+</sup>), and available P (Pa).

|                              | AOB          | AOA         | <i>nirS</i>  | <i>nirK</i> | NH <sub>4</sub> <sup>+</sup> | NO <sub>3</sub> <sup>-</sup> | Pa   |
|------------------------------|--------------|-------------|--------------|-------------|------------------------------|------------------------------|------|
| AOB                          | 1,00         |             |              |             |                              |                              |      |
| AOA                          | 0,31         | 1,00        |              |             |                              |                              |      |
| <i>nirS</i>                  | <b>-0,75</b> | -0,29       | 1,00         |             |                              |                              |      |
| <i>nirK</i>                  | <b>0,91</b>  | 0,40        | <b>-0,84</b> | 1,00        |                              |                              |      |
| NH <sub>4</sub> <sup>+</sup> | <b>0,86</b>  | 0,39        | <b>-0,78</b> | <b>0,90</b> | 1,00                         |                              |      |
| NO <sub>3</sub> <sup>-</sup> | <b>0,41</b>  | <b>0,50</b> | <b>-0,51</b> | <b>0,53</b> | <b>0,68</b>                  | 1,00                         |      |
| Pa                           | -0,07        | -0,10       | 0,39         | -0,13       | -0,13                        | -0,15                        | 1,00 |

Bolded correlation coefficients indicate statistical significance at  $\alpha = 0.05$ .

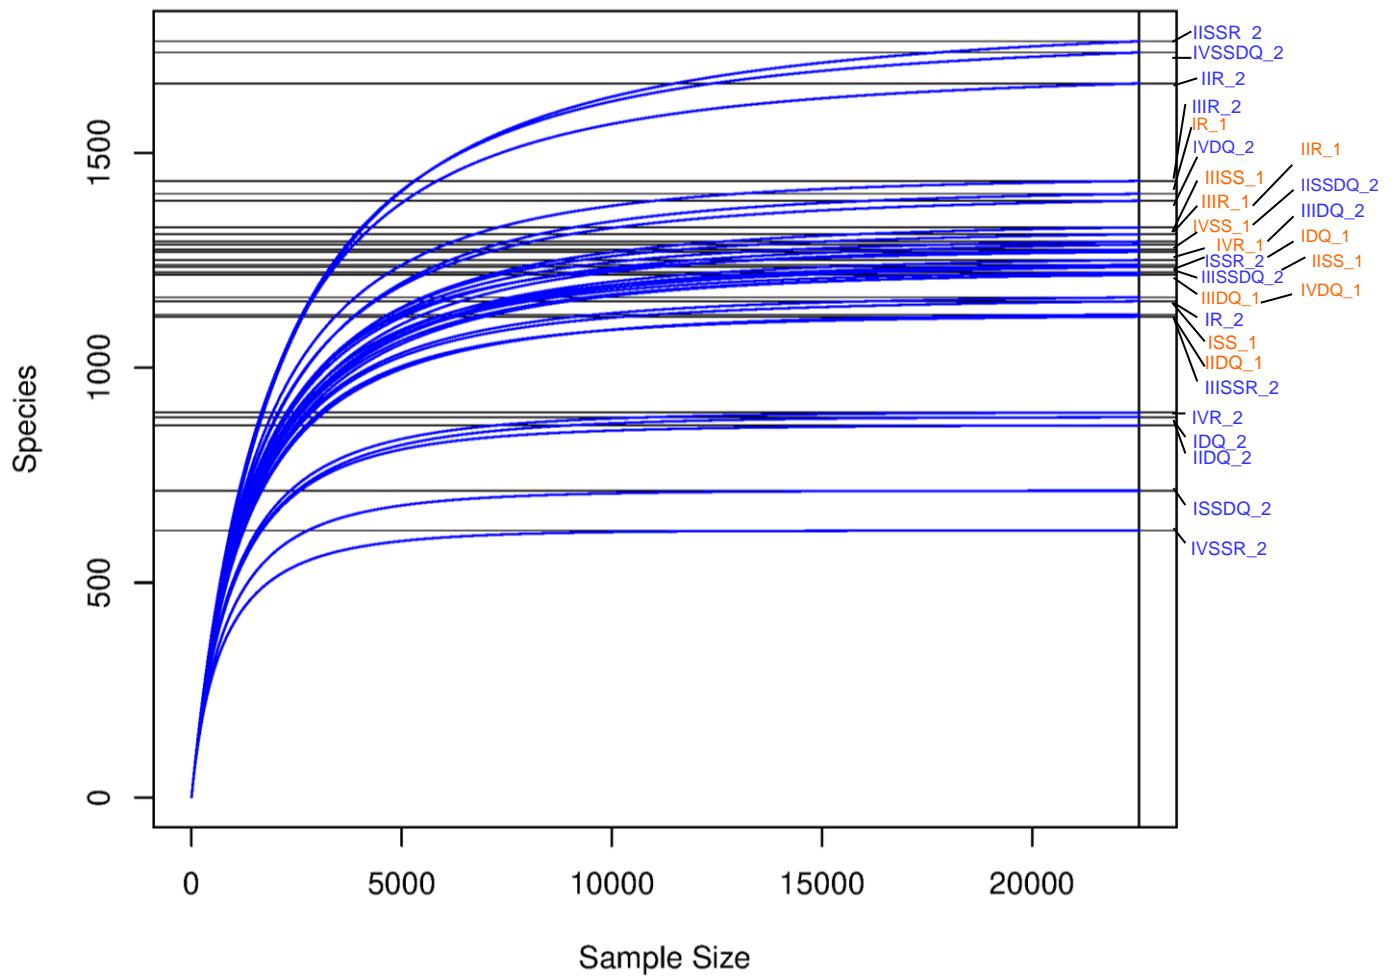

**Figure S1.** Rarefaction curves of the different samples analyzed through barcoded amplicon-sequencing. The number of amplicon sequence variants (“species”) of Bacteria is indicated for an increasing sampling effort (“sample size”). The letters DQ indicate chemical suppression, letters R rolling, and letters SS no suppression. The Roman numerals (I to IV) identify the replicates of each treatment and the 2018 samples are indicated in orange and the 2019 samples in blue.

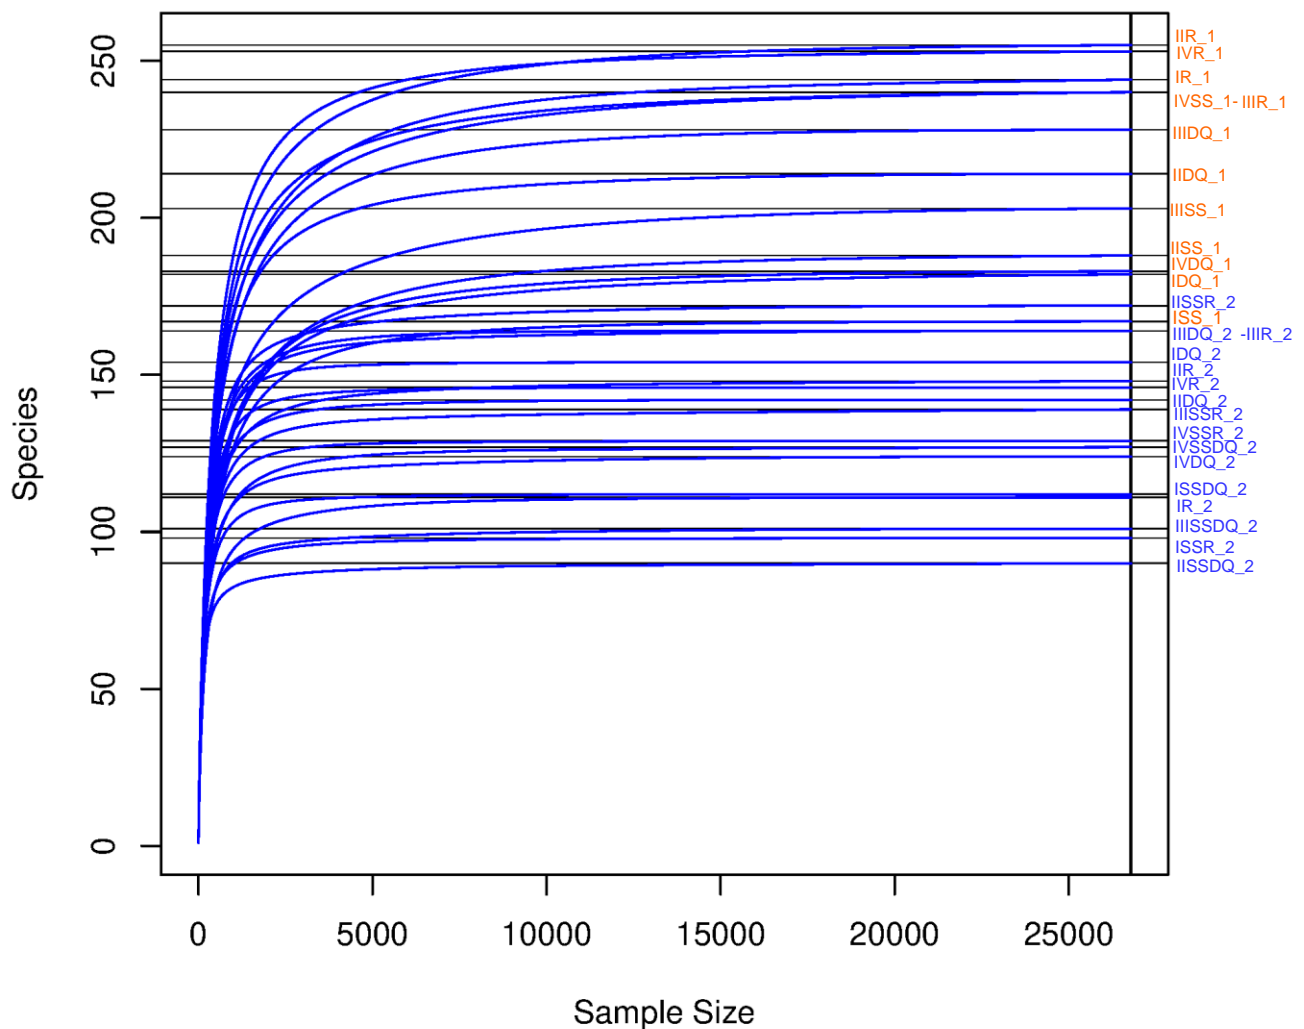

**Figure S2.** Rarefaction curves of the different samples analyzed through barcoded amplicon-sequencing. The number of amplicon sequence variants (“species”) of Fungi is indicated for an increasing sampling effort (“sample size”). The letters DQ indicate chemical suppression, letters R rolling, and letters SS no suppression. The Roman numerals (I to IV) identify the replicates of each treatment and the 2018 samples are indicated in orange and the 2019 samples in blue.

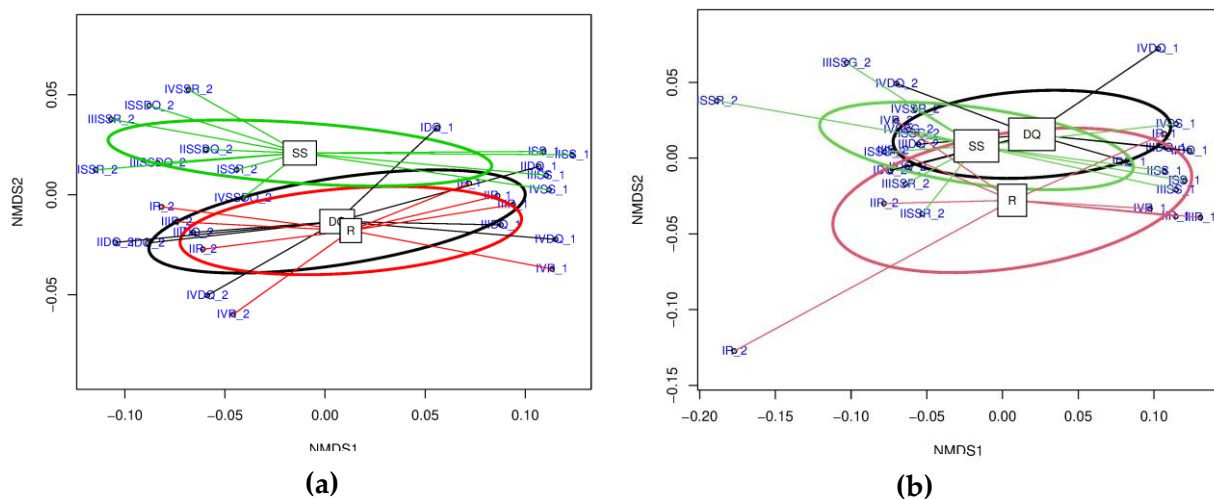

**Figure S3.** Non-metric multidimensional scaling of Bacteria (Stress = 0.08) (a) and Fungi (Stress = 0.105) (b) using generalized UniFrac distance. The letters DQ indicate chemical suppression, letters R rolling, and letters SS no suppression, Roman numerals (I to IV) identify the replicates and the number 1 indicating the 2018 samples and the number 2 indicating the 2019 samples. Centroids are indicated by boxes. The standard error of DQ, R and SS are indicated by black, red, and green ellipses, respectively.

## References

1. Fierer, N.; Jackson, J.A.; Vilgalys, R.; Jackson, R.B. Assessment of Soil Microbial Community Structure by Use of Taxon-Specific Quantitative PCR Assays. *Appl. Environ. Microbiol.* 2005, *71*, 4117–4120, doi:10.1128/AEM.71.7.4117-4120.2005.
2. Hoshino, Y.T.; Morimoto, S.; Hayatsu, M.; Nagaoka, K.; Suzuki, C.; Karasawa, T.; Takenaka, M.; Akiyama, H. Effect of Soil Type and Fertilizer Management on Archaeal Community in Upland Field Soils. *Microbes Environ.* 2011, *26*, 307–316, doi:10.1264/jsme2.ME11131.
3. Rotthauwe, J.H.; Witzel, K.P.; Liesack, W. The Ammonia Monooxygenase Structural Gene *AmoA* as a Functional Marker: Molecular Fine-Scale Analysis of Natural Ammonia-Oxidizing Populations. *Appl. Environ. Microbiol.* 1997, *63*, 4704–4712, doi:10.1128/aem.63.12.4704-4712.1997.
4. Leininger, S.; Urich, T.; Schloter, M.; Schwark, L.; Qi, J.; Nicol, G.W.; Prosser, J.I.; Schuster, S.C.; Schleper, C. Archaea Predominate among Ammonia-Oxidizing Prokaryotes in Soils. *Nature* 2006, *442*, 806–809, doi:10.1038/nature04983.
5. Schauss, K.; Focks, A.; Leininger, S.; Kotzerke, A.; Heuer, H.; Thiele-Bruhn, S.; Sharma, S.; Wilke, B.M.; Matthies, M.; Smalla, K.; et al. Dynamics and Functional Relevance of Ammonia-Oxidizing Archaea in Two Agricultural Soils. *Environ. Microbiol.* 2009, *11*, 446–456, doi:10.1111/j.1462-2920.2008.01783.x.
6. Henry, S.; Baudoin, E.; López-Gutiérrez, J.C.; Martin-Laurent, F.; Brauman, A.; Philippot, L. Quantification of Denitrifying Bacteria in Soils by NirK Gene Targeted Real-Time PCR. *J. Microbiol. Methods* 2004, *59*, 327–335, doi:10.1016/j.mimet.2004.07.002.
7. Kandeler, E.; Deiglmayr, K.; Tschirko, D.; Bru, D.; Philippot, L. Abundance of NarG, NirS, NirK, and NosZ Genes of Denitrifying Bacteria during Primary Successions of a Glacier Foreland. *Appl. Environ. Microbiol.* 2006, *72*, 5957–5962, doi:10.1128/AEM.00439-06.
